# Supplementary material for: Morphology control towards bright and stable inorganic halide perovskite light-emitting diodes
Source: Royal Society of Chemistry journal article supplement (doi:10.1039/c7tc04631f), 2018-01-01
Supplement: c7tc04631f1.pdf [file c7tc04631f1.pdf]

Supporting Information

## **Morphology control towards bright and stable inorganic halide perovskite light-emitting diodes**

Fangming Jin,<sup>a</sup> Bo Zhao,<sup>b,d\*</sup> Bei Chu,<sup>a</sup> Haifeng Zhao,<sup>a</sup> Zisheng Su,<sup>a,c\*</sup> Wenlian Li<sup>a</sup> and Furong Zhu<sup>d\*</sup>

<sup>a</sup>State Key Laboratory of Luminescence and Applications, Changchun Institute of Optics, Fine Mechanics and Physics, Chinese Academy of Sciences, Changchun 130033, China

<sup>b</sup>Key Laboratory of Interface Science and Engineering in Advanced Materials of Ministry of Education, Research Center of Advanced Materials Science and Technology, Taiyuan University of Technology, Taiyuan 030024, China

<sup>c</sup>College of Physics and Information Engineering, Quanzhou Normal University, Quanzhou 362000, China

<sup>d</sup>Department of Physics, Institute of Advance Materials, and Institute of Research and Continuing Education (Shenzhen), Hong Kong Baptist University, Hong Kong, China

\*E-mail: zhaobo01@tyut.edu.cn, suzs@ciomp.ac.cn, frzhu@hkbu.edu.hk

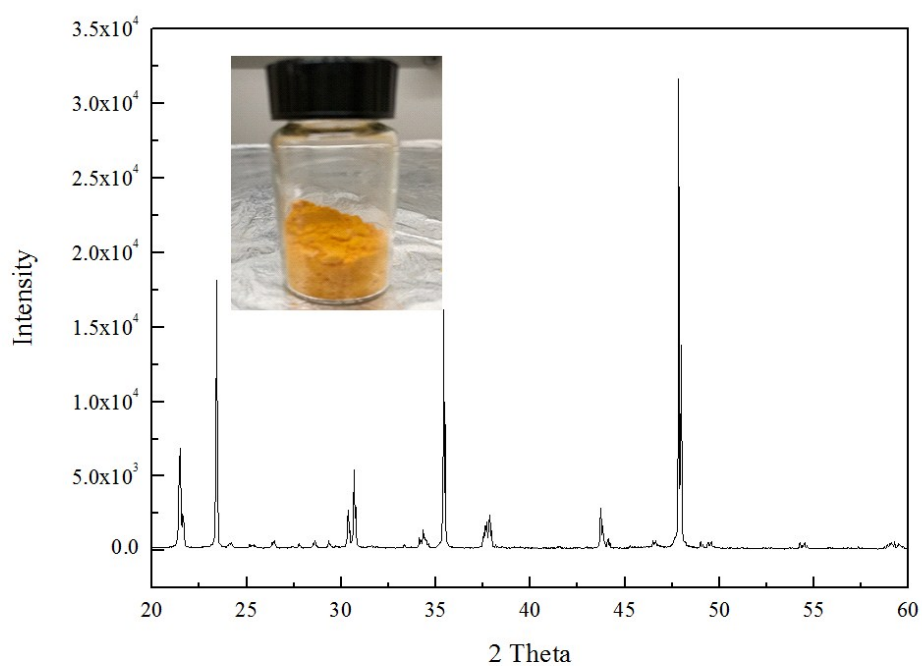

**Fig. S1** XRD spectrum measured for the CsPbBr<sub>3</sub> powders synthesized in this work. Inset shows the photo picture taken for the CsPbBr<sub>3</sub> powders.

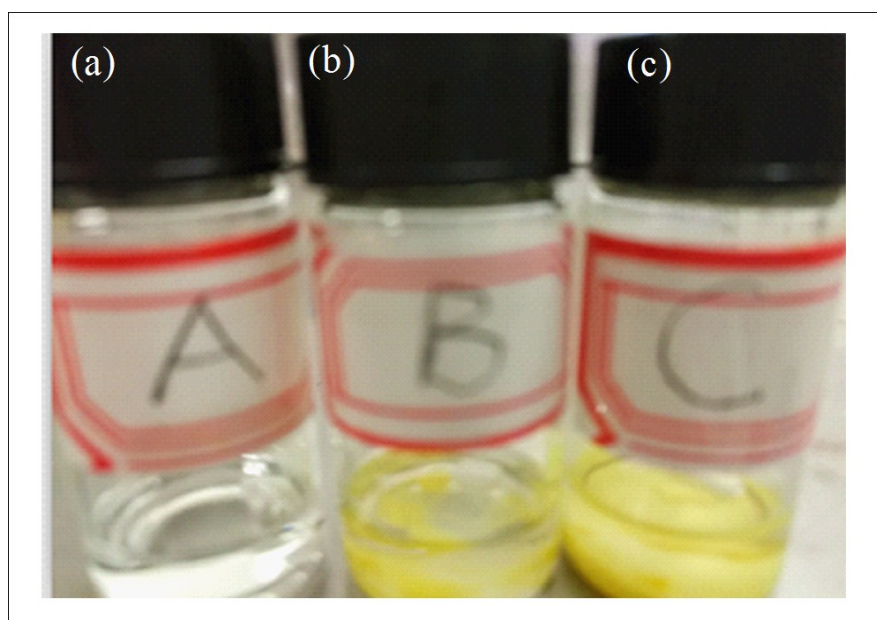

**Fig. S2** Photo pictures taken for different precursor solutions of (a) Precursor-A, (b) Precursor-B and (c) Precursor-C.

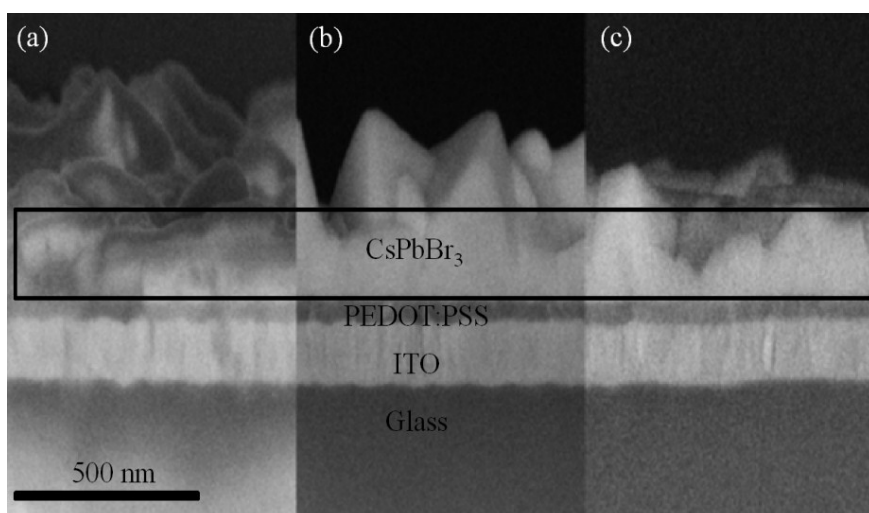

**Fig. S3** SEM images showing the cross-sectional view of the CsPbBr<sub>3</sub> perovskite films formed on the surface of PEDOT:PSS hole transporting layer, prepared by different solutions of (a) Precursor-A, (b) Precursor-B and (c) Precursor-C.

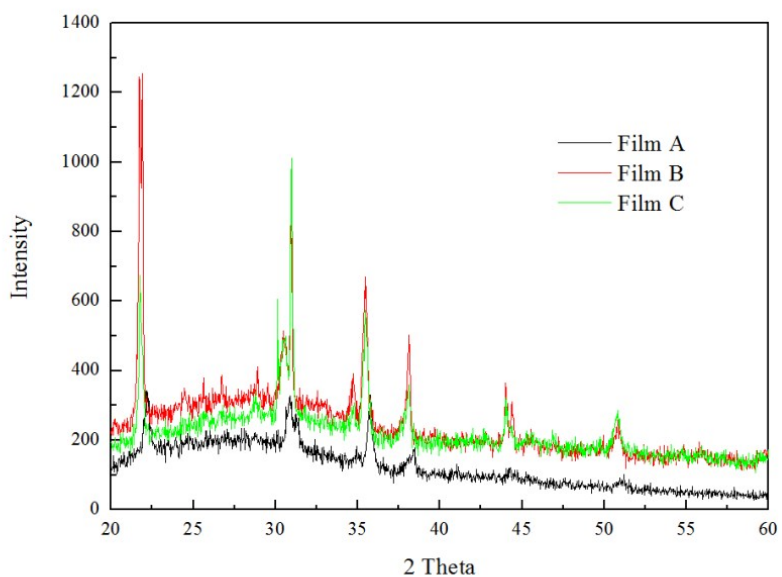

**Fig. S4** XRD spectra measured for the CsPbBr<sub>3</sub> perovskite films prepared by different solutions of Precursor-A, Precursor-B and Precursor-C.

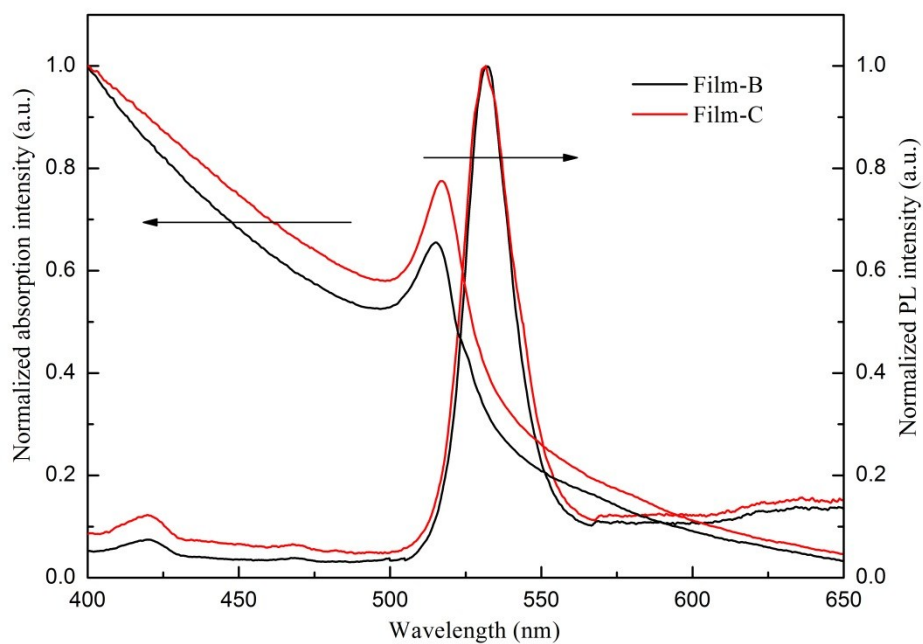

**Fig. S5** The absorption and PL spectra measured for the CsPbBr<sub>3</sub> perovskite films prepared by different solutions of Precursor-B and Precursor-C.
